# Supplementary material
Source: publisher site journal article supplement (https://spandidos-publications.com/2223/downloadSupplementary)
Supplement: Supplementary file 1 [file downloadSupplementary]

## Sheet: tear_regulated
Table SI. Differentially expressed proteins of orbital decompression for disfiguring exophthalmos in inactive thyroid associated ophthalmopathy.
No.	UniProt Entry	UniProtKB ID	Protein name	Gene name
1	A0A087WW43	A0A087WW43_HUMAN	Inter-alpha-trypsin inhibitor heavy chain H3	ITIH3; H3P; ITI-HC3; SHAP
2	A0A087WZM2	A0A087WZM2_HUMAN	Ribonuclease T2	RNASET2; RNASE6PL; bA514O12.3
3	A0A0A0MRM8	A0A0A0MRM8_HUMAN	Unconventional myosin-VI	MYO6; DFNA22; DFNB37
4	A0A0B4J231	A0A0B4J231_HUMAN	Immunoglobulin lambda-like polypeptide 5	IGLL5; IGL; IGLV; VL-MAR
5	A0A0C4DGB5	A0A0C4DGB5_HUMAN	Calpastatin	CAST; BS-17; PLACK
6	A0A0C4DH29	HV103_HUMAN	Immunoglobulin heavy variable 1-3	IGHV1-3
7	A0A0D9SFE5	A0A0D9SFE5_HUMAN	Lamin B1, isoform CRA_a	LMNB1; hCG_27033; ADLD; LMN; LMN2; LMNB
8	A0A0U1RRM4	A0A0U1RRM4_HUMAN	Polypyrimidine tract-binding protein 1	PTBP1; HNRNP-I; HNRNPI; HNRPI; PTB; PTB-1; PTB-T; PTB2; PTB3; PTB4; pPTB
9	A0A182DWH7	A0A182DWH7_HUMAN	Selenoprotein P	SELENOP; SEPP1; SELP; SEPP; SeP
10	B0YIW6	B0YIW6_HUMAN	Coatomer subunit delta	ARCN1; hCG_40220; COPD
11	B0YJC4	B0YJC4_HUMAN	Vimentin	VIM; CTRCT30; HEL113
12	B4DEV8	B4DEV8_HUMAN	Proteasome subunit alpha type 1	PSMA1; HC2; HEL-S-275; NU; PROS30
13	B7Z9C2	B7Z9C2_HUMAN	Nucleosome assembly protein 1-like 1	NAP1L1; NAP1; NAP1L; NRP
14	E7EQ64	E7EQ64_HUMAN	Trypsin-1	PRSS1; TRP1; TRY1; TRY4; TRYP1
15	F6TLX2	F6TLX2_HUMAN	Glyoxalase domain-containing protein 4	GLOD4; C17orf25; CGI-150; HC71
16	F8VUA6	F8VUA6_HUMAN	60S ribosomal protein L18	RPL18; L18
17	G3V295	G3V295_HUMAN	Proteasome subunit alpha type 6	PSMA6; IOTA; PROS27; p27K
18	H0YFA4	H0YFA4_HUMAN	Cysteine-rich protein 2	CRIP2; CRIP; CRP2; ESP1
19	I3L0N3	I3L0N3_HUMAN	Vesicle-fusing ATPase	NSF; SKD2
20	J3KNB4	J3KNB4_HUMAN	Cathelicidin antimicrobial peptide	CAMP; hCG_18336; CAP-18; CAP18; CRAMP; FALL-39; FALL39; HSD26; LL37
21	J3KQ18	J3KQ18_HUMAN	D-dopachrome decarboxylase	DDT; DDCT
22	K7ELL7	K7ELL7_HUMAN	Glucosidase 2 subunit beta	PRKCSH; AGE-R2; G19P1; GIIB; PCLD; PKCSH; PLD1; VASAP-60
23	O14657	TOR1B_HUMAN	Torsin-1B	TOR1B; DQ1; FKSG18
24	O75594	PGRP1_HUMAN	Peptidoglycan recognition protein 1	PGLYRP1; PGLYRP; PGRP; TNFSF3L; SBBI68; UNQ639/PRO1269; PGRP-S; PGRPS; TAG7
25	O75882	ATRN_HUMAN	Attractin	ATRN; KIAA0548; MGCA; DPPT-L
26	O95171	SCEL_HUMAN	Sciellin	SCEL
27	P00491	PNPH_HUMAN	Purine nucleoside phosphorylase	PNP; NP; PRO1837; PUNP
28	P00748	FA12_HUMAN	Coagulation factor XII	F12; HAE3; HAEX; HAF
29	P01024	CO3_HUMAN	Complement C3	C3; CPAMD1; AHUS5; ARMD9; ASP; C3a; C3b; HEL-S-62p
30	P01034	CYTC_HUMAN	Cystatin-C	CST3; ARMD11; HEL-S-2
31	P01599	KV117_HUMAN	Immunoglobulin kappa variable 1-17	IGKV1-17
32	P01721	LV657_HUMAN	Immunoglobulin lambda variable 6-57	IGLV6-57; VPREB1; CD179a; IGI; IGVPB; VPREB
33	P03973	SLPI_HUMAN	Antileukoproteinase	SLPI; WAP4; WFDC4; ALK1; ALP; BLPI; HUSI; HUSI-I; MPI
34	P08294	SODE_HUMAN	Extracellular superoxide dismutase	SOD3; EC-SOD
35	P08311	CATG_HUMAN	Cathepsin G	CTSG; CATG; CG
36	P08571	CD14_HUMAN	Monocyte differentiation antigen CD14	CD14
37	P08697	A2AP_HUMAN	Alpha-2-antiplasmin	SERPINF2; AAP; PLI; A2AP; ALPHA-2-PI; API
38	P08779	K1C16_HUMAN	Keratin, type I cytoskeletal 16	KRT16; KRT16A; CK16; FNEPPK; K16; K1CP; NEPPK; PC1
39	P09228	CYTT_HUMAN	Cystatin-SA	CST2
40	P0DJI8	SAA1_HUMAN	Serum amyloid A-1 protein	SAA1; PIG4; SAA; SAA2; TP53I4
41	P10153	RNAS2_HUMAN	Non-secretory ribonuclease	RNASE2; EDN; RNS2; RAF3
42	P11021	BIP_HUMAN	Endoplasmic reticulum chaperone BiP	HSPA5; GRP78; BIP; HEL-S-89n; MIF2
43	P11717	MPRI_HUMAN	Cation-independent mannose-6-phosphate receptor	IGF2R; MPRI; CD222; CI-M6PR; CIMPR; M6P-R; M6P/IGF2R; MPR_300; MPR1; MPR300
44	P12035	K2C3_HUMAN	Keratin, type II cytoskeletal 3	KRT3; CK3; K3
45	P13671	CO6_HUMAN	Complement component C6	C6
46	P13796	PLSL_HUMAN	Plastin-2	LCP1; PLS2; CP64; HEL-S-37; L-PLASTIN; LC64P; LPL
47	P14780	MMP9_HUMAN	Matrix metalloproteinase-9	MMP9; CLG4B; GELB; MANDP2; MMP-9
48	P15309	PPAP_HUMAN	Prostatic acid phosphatase	ACPP; 5'-NT; ACP-3; ACP3
49	P15814	IGLL1_HUMAN	Immunoglobulin lambda-like polypeptide 1	IGLL1; IGL1; 14.1; AGM2; CD179b; IGL5; IGLJ14.1; IGLL; IGO; IGVPB; VPREB2
50	P20160	CAP7_HUMAN	Azurocidin	AZU1; AZAMP; AZU; CAP37; HBP; HUMAZUR; NAZC; hHBP
51	P23083	HV102_HUMAN	Immunoglobulin heavy variable 1-2	IGHV1-2
52	P24666	PPAC_HUMAN	Low molecular weight phosphotyrosine protein phosphatas	ACP1; HAAP; LMW-PTP
53	P28799	GRN_HUMAN	Progranulin	GRN; CLN11; GEP; GP88; PCDGF; PEPI; PGRN
54	P34096	RNAS4_HUMAN	Ribonuclease 4	RNASE4; RNS4; RAB1
55	P35858	ALS_HUMAN	Insulin-like growth factor-binding protein complex acid labile subunit	IGFALS; ALS; ACLSD
56	P40121	CAPG_HUMAN	Macrophage-capping protein	CAPG; AFCP; MCP; HEL-S-66
57	P47929	LEG7_HUMAN	Galectin-7	LGALS7; PIG1; ; LGALS7B; GAL7; LGALS7A
58	P50991	TCPD_HUMAN	T-complex protein 1 subunit delta	CCT4; CCTD; SRB; CCT-DELTA; Cctd
59	Q00796	DHSO_HUMAN	Sorbitol dehydrogenase	SORD; HEL-S-95n; SORD1
60	Q04917	1433F_HUMAN	14-3-3 protein eta	YWHAH; YWHA1
61	Q06210	GFPT1_HUMAN	Glutamine-fructose-6-phosphate aminotransferase [isomerizing] 1	GFPT1; GFAT; GFPT; CMS12; CMSTA1; GFA; GFAT_1; GFAT1; GFAT1m; GFPT1L; MSLG
62	Q13790	APOF_HUMAN	Apolipoprotein F	APOF; Apo-F; LTIP
63	Q14247	SRC8_HUMAN	Src substrate cortactin	CTTN; EMS1
64	Q14435	GALT3_HUMAN	Polypeptide N-acetylgalactosaminyltransferase 3	GALNT3; GalNAc-T3; HFTC; HHS
65	Q14894	CRYM_HUMAN	Ketimine reductase mu-crystallin	CRYM; THBP; DFNA40
66	Q15149	PLEC_HUMAN	Plectin	PLEC; PLEC1; EBS1; EBSMD; EBSND; EBSO; EBSOG; EBSPA; HD1; LGMD2Q; PCN; PLEC1b; PLTN
67	Q15181	IPYR_HUMAN	Inorganic pyrophosphatase	PPA1; IOPPP; PP; HEL-S-66p; PP1; SID6-8061
68	Q15582	BGH3_HUMAN	Transforming growth factor-beta-induced protein ig-h3	TGFBI; BIGH3; CDB1; CDG2; CDGG1; CSD; CSD1; CSD2; CSD3; EBMD; LCD1
69	Q15904	VAS1_HUMAN	V-type proton ATPase subunit S1	ATP6AP1; ATP6IP1; ATP6S1; VATPS1; XAP3; 16A; Ac45; CF2; XAP-3
70	Q16610	ECM1_HUMAN	Extracellular matrix protein 1	ECM1; URBWD
71	Q5T6H7	Q5T6H7_HUMAN	Xaa-Pro aminopeptidase 1	XPNPEP1; APP1; SAMP; XPNPEP; XPNPEPL; XPNPEPL1
72	Q86VP6	CAND1_HUMAN	Cullin-associated NEDD8-dissociated protein 1	CAND1; KIAA0829; TIP120; TIP120A
73	Q8N1N4	K2C78_HUMAN	Keratin, type II cytoskeletal 78	KRT78; K5B; KB40; CK-78; K78; Kb40
74	Q8WUM4	PDC6I_HUMAN	Programmed cell death 6-interacting protein	PDCD6IP; AIP1; ALIX; KIAA1375; DRIP4; HP95
75	Q96MK3	FA20A_HUMAN	Pseudokinase FAM20A	FAM20A; UNQ9388/PRO34279; AI1G; AIGFS; FP2747
76	Q99536	VAT1_HUMAN	Synaptic vesicle membrane protein VAT-1 homolog	VAT1; VATI
77	Q9BS26	ERP44_HUMAN	Endoplasmic reticulum resident protein 44	ERP44; KIAA0573; TXNDC4; UNQ532/PRO1075; PDIA10
78	Q9HBR0	S38AA_HUMAN	Putative sodium-coupled neutral amino acid transporter 10	SLC38A10; PP1744
79	Q9NZP8	C1RL_HUMAN	Complement C1r subcomponent-like protein	C1RL; C1RL1; C1RLP; CLSPA; C1r-LP; CLSPa
80	Q9P1F3	ABRAL_HUMAN	Costars family protein ABRACL	ABRACL; C6orf115; HSPC280; PRO2013; Costars
81	Q9UNZ2	NSF1C_HUMAN	NSFL1 cofactor p47	NSFL1C; UBXN2C; P47; UBX1; UBXD10; dJ776F14.1
82	Q9Y5Z4	HEBP2_HUMAN	Heme-binding protein 2	HEBP2; C6orf34; SOUL; C6ORF34B; PP23
83	Q9Y6R7	FCGBP_HUMAN	IgGFc-binding protein	FCGBP; FC(GAMMA)BP
